# Supplementary material for: Cerium Oxide Nanoparticles Induced Toxicity in Human Lung Cells: Role of ROS Mediated DNA Damage and Apoptosis
Source: Hindawi journal article supplement (doi:10.1155/2014/891934), 2014-01-01
Supplement: f1 [file 891934.f1.pdf]

1 Graphical Abstract:

2

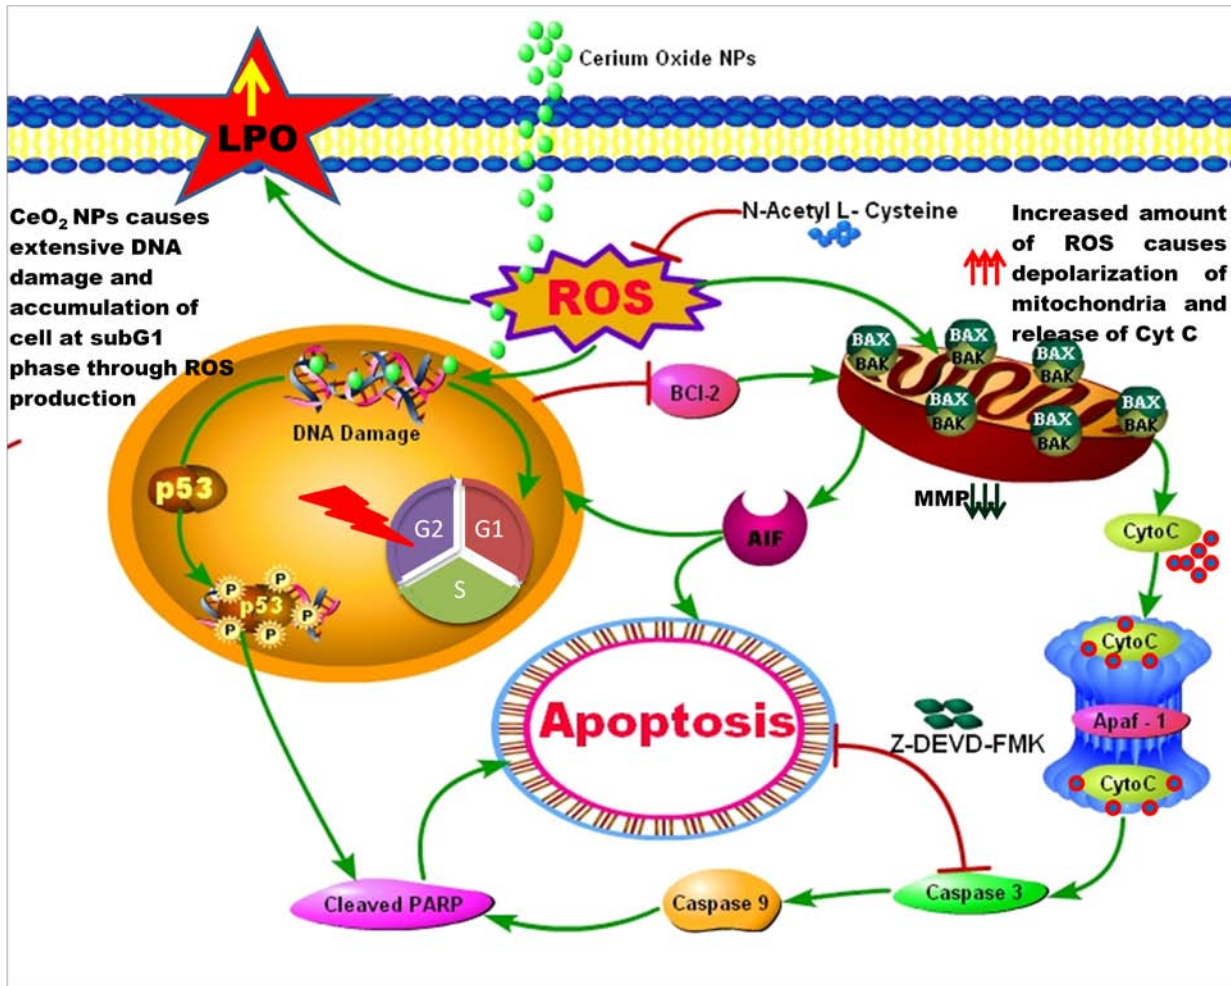

3

4 Graphical diagram elucidating the mechanism of CeO<sub>2</sub> induced toxicity in A549  
5 cells
